# Supplementary material for: Synthesis of hexagonal and cubic ZnIn2S4 nanosheets for the photocatalytic reduction of CO2 with methanol
Source: Royal Society of Chemistry journal article supplement (doi:10.1039/c4ra13191f), 2014-12-08
Supplement: c4ra13191f1.pdf [file c4ra13191f1.pdf]

## Electronic Supplementary Information (ESI)

### Synthesis of hexagonal and cubic ZnIn<sub>2</sub>S<sub>4</sub> nanosheets for the photocatalytic reduction of CO<sub>2</sub> with methanol

Jingshuai Chen,<sup>ab</sup> Feng Xin,<sup>\*ab</sup> Xiaohong Yin,<sup>\*c</sup> Tianyu Xiang<sup>ab</sup> and Yuwen Wang<sup>ab</sup>

<sup>a</sup> School of Chemical Engineering and Technology, Tianjin University, Collaborative Innovation

Center of Chemical Science and Engineering (Tianjin), Tianjin 300072, P. R. China. Fax: +86 22

27892359; Tel: +86 22 27409533; E-mail: [xinf@tju.edu.cn](mailto:xinf@tju.edu.cn) (F. Xin).

<sup>b</sup> Collaborative Innovation Center of Chemical Science and Engineering (Tianjin), Tianjin, 300072, P.

R. China.

<sup>c</sup> School of Chemistry and Chemical Engineering, Tianjin University of Technology, Tianjin 300384, P.

R. China. E-mail: [yinxiaohong@tjut.edu.cn](mailto:yinxiaohong@tjut.edu.cn)

## Experimental Details

**Synthesis of  $\text{ZnIn}_2\text{S}_4$  microspheres:** In a typical synthesis procedure,  $\text{Zn}(\text{NO}_3)_2 \cdot 6\text{H}_2\text{O}$  (0.150 g),  $\text{In}(\text{NO}_3)_3 \cdot 4.5\text{H}_2\text{O}$  (0.391 g), citric acid (CA, 0.1 g) and thiourea (TU, 0.308 g) were dissolved in 40 mL of deionized water and transferred to a 70 mL Teflon liner. The Teflon liner was sealed in the stainless steel autoclave and heated at  $180^\circ\text{C}$  for 18 h. After being cooled to room temperature, the yellow precipitate was collected by centrifugation and washed with ethanol and the distilled water for three times, respectively. And then it was dried at  $60^\circ\text{C}$  to obtain the  $\text{ZnIn}_2\text{S}_4$  microspheres.

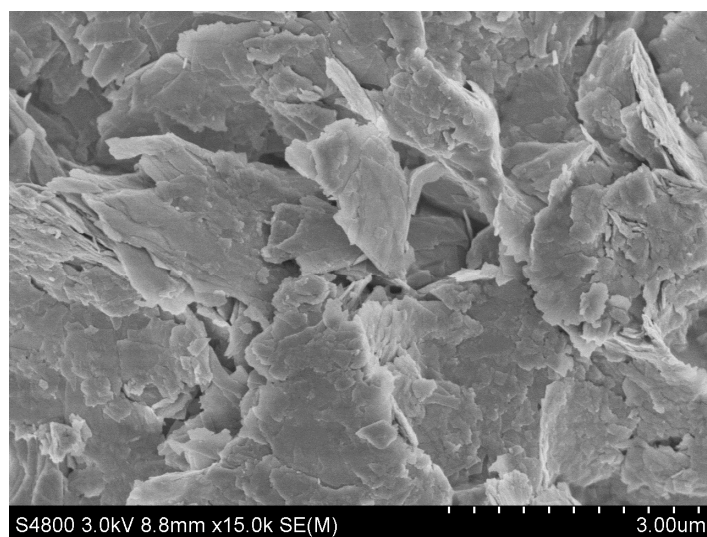

**Figure S1.** SEM image of the  $\text{ZnIn}_2\text{S}_4$  samples obtained via hydrothermal method.

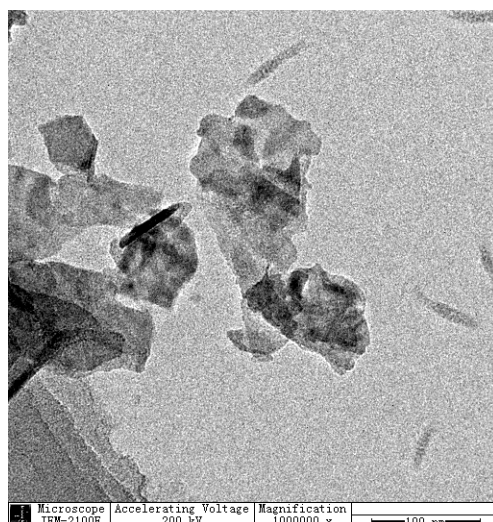

**Figure S2.** TEM image of the hexagonal ZnIn<sub>2</sub>S<sub>4</sub> nanosheets.

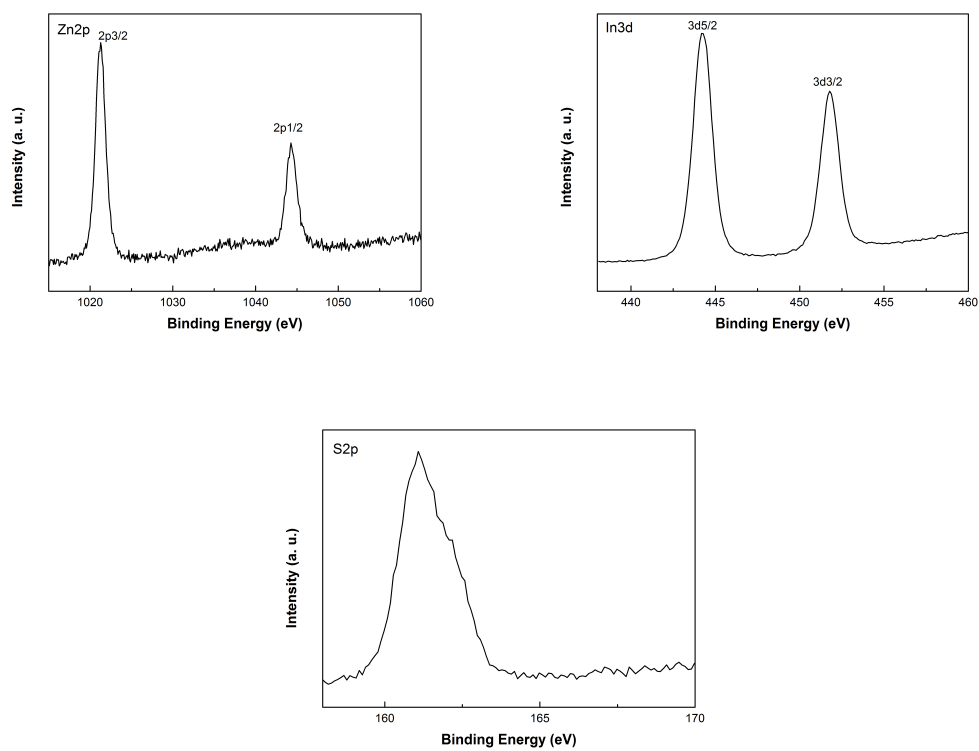

**Figure S3.** XPS spectra of the hexagonal ZnIn<sub>2</sub>S<sub>4</sub> nanosheets: high-resolution In3d, Zn2p, and S2p spectra.

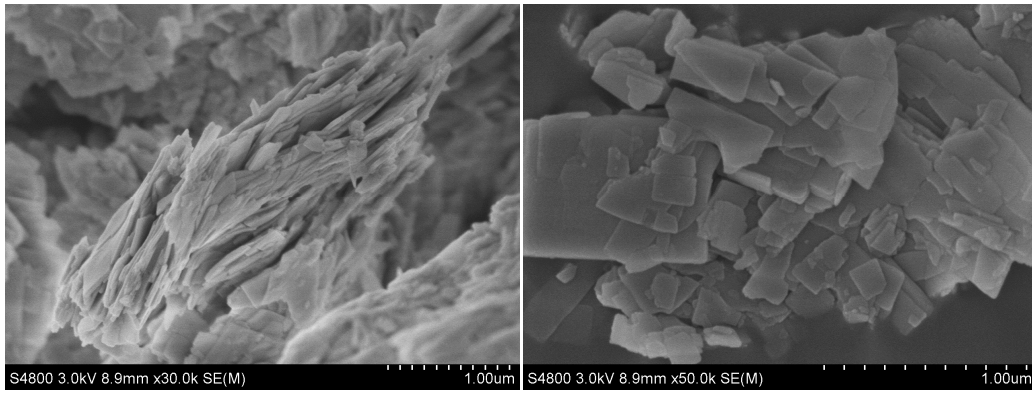

Figure S4. SEM image of  $\text{ZnIn}_2\text{S}_4$ -DETA precursor suggesting a sheet-like structure.

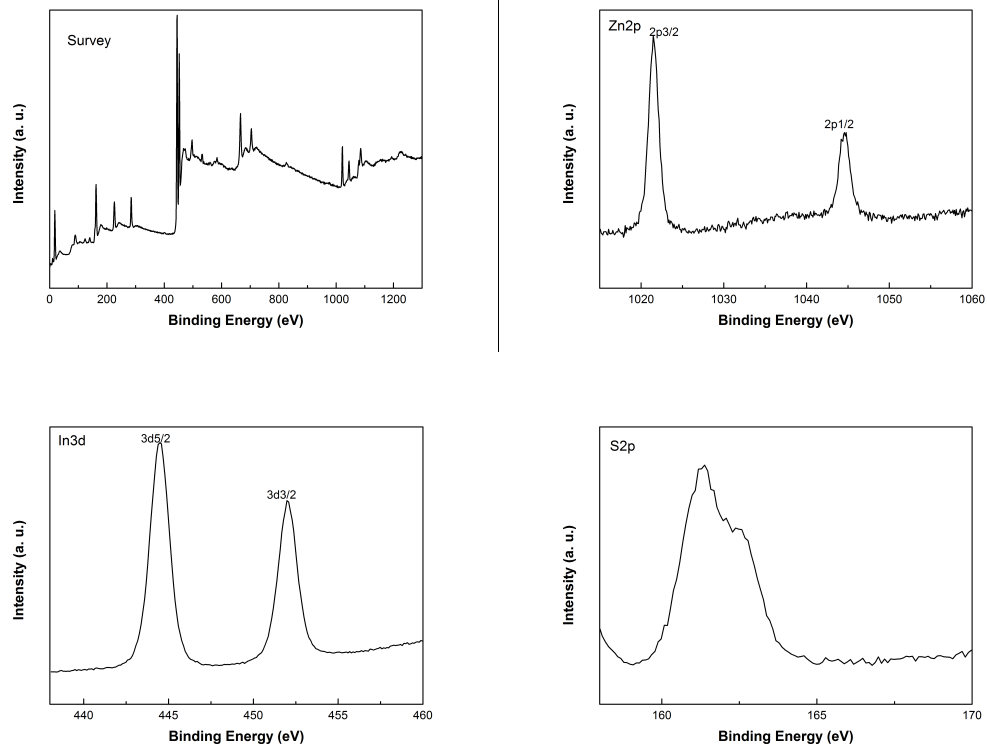

Figure S5. XPS spectra of the cubic  $\text{ZnIn}_2\text{S}_4$  nanosheets.

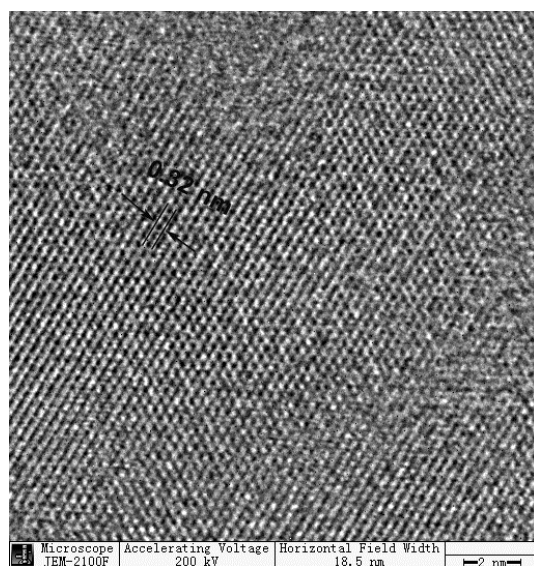

**Figure S6.** HRTEM image of cubic  $\text{ZnIn}_2\text{S}_4$  nanosheets.

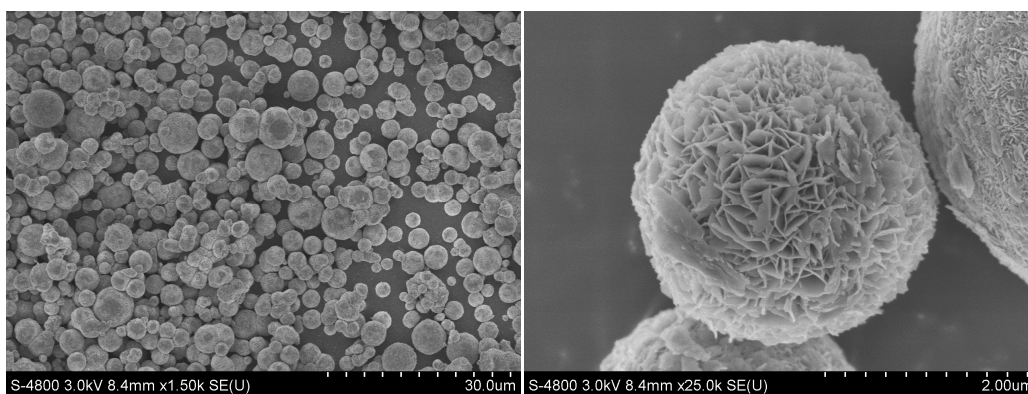

**Figure S7.** SEM image of  $\text{ZnIn}_2\text{S}_4$  microspheres.

Tab. S1 The BET result of as-prepared samples.

| Sample                                     | Hexagonal $\text{ZnIn}_2\text{S}_4$ | Cubic $\text{ZnIn}_2\text{S}_4$ | Microspheres $\text{ZnIn}_2\text{S}_4$ |
|--------------------------------------------|-------------------------------------|---------------------------------|----------------------------------------|
| $S_{\text{BET}}/\text{m}^2 \text{ g}^{-1}$ | 28.65                               | 25.84                           | 42.16                                  |

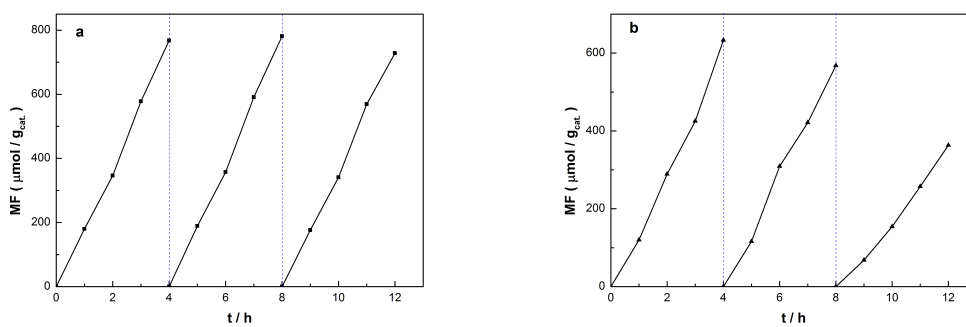

**Figure S8.** Time course of photocatalytic MF production over hexagonal (a) and cubic (b)  $\text{ZnIn}_2\text{S}_4$  nanosheets.

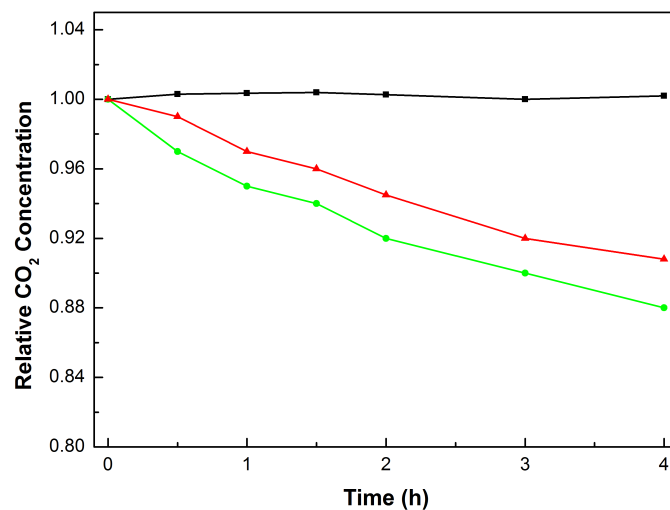

**Figure S9.** Relative concentration of  $\text{CO}_2$  (the peak at  $2343\text{ cm}^{-1}$ ) as a function of time using hexagonal  $\text{ZnIn}_2\text{S}_4$  nanosheets in the dark (black), using cubic  $\text{ZnIn}_2\text{S}_4$  nanosheets under light irradiation (red), and using hexagonal  $\text{ZnIn}_2\text{S}_4$  nanosheets under light irradiation (green).
